# Supplementary material for: Stage I Squamous Cell Carcinoma of the Anus: Is Radiation Therapy Alone Sufficient Treatment?
Source: PubMed Central journal article supplement (PMC7694229; doi:10.3390/cancers12113248), 2020-11-04
Supplement: cancers-12-03248-s001.pdf [file cancers-12-03248-s001.pdf]

Article

# Stage I Squamous Cell Carcinoma of the Anus: Is Radiation Therapy Alone Sufficient Treatment?

Eric Miller, Ansel Nalin, Dayssy Diaz Pardo, Andrea Arnett, Laith Abushahin, Syed Husain, Ning Jin, Terence Williams, and Jose Bazan

Supplementary Materials:

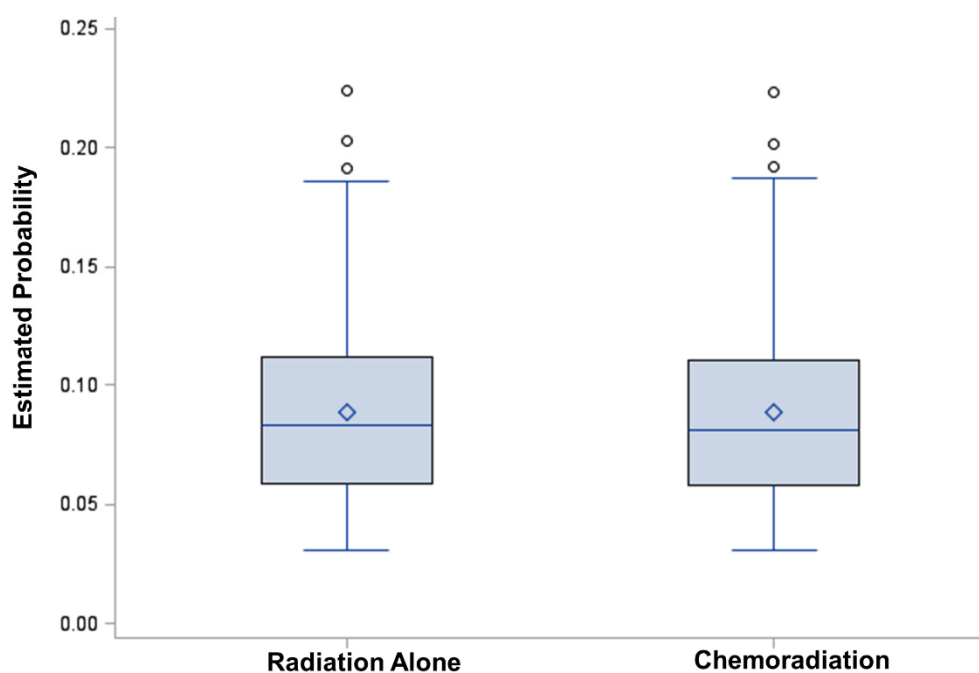

**Figure 1.** Distribution of propensity scores in the chemoradiation and radiation therapy alone cohorts.

**Table 1.** Patient characteristics and standardized-differences in the propensity-matched cohort of chemoradiation and radiation therapy alone.

| <b>Characteristic</b>                     | <b>Chemoradiation<br/>(N=287)<br/>Number (%)</b> | <b>Radiation therapy alone<br/>(N=287)<br/>Number (%)</b> | <b>Standardized-<br/>differences</b> |
|-------------------------------------------|--------------------------------------------------|-----------------------------------------------------------|--------------------------------------|
| <b>Age (years)</b>                        |                                                  |                                                           |                                      |
| <50                                       | 58 (20.2)                                        | 59 (20.6)                                                 | 0.0522                               |
| 50-59                                     | 73 (25.4)                                        | 68 (23.7)                                                 |                                      |
| 60-69                                     | 60 (20.9)                                        | 65 (22.6)                                                 |                                      |
| ≥70                                       | 96 (33.5)                                        | 95 (33.1)                                                 |                                      |
| <b>Gender</b>                             |                                                  |                                                           | 0.0145                               |
| Female                                    | 183 (63.8)                                       | 181 (63.1)                                                |                                      |
| Male                                      | 104 (36.2)                                       | 106 (36.9)                                                |                                      |
| <b>Race</b>                               |                                                  |                                                           | 0.0886                               |
| White                                     | 259 (90.2)                                       | 251 (87.5)                                                |                                      |
| Non-white                                 | 28 (9.8)                                         | 36 (12.5)                                                 |                                      |
| <b>Charlson-Deyo score</b>                |                                                  |                                                           | 0.0385                               |
| 0                                         | 236 (82.2)                                       | 232 (80.8)                                                |                                      |
| 1                                         | 27 (9.4)                                         | 30 (10.5)                                                 |                                      |
| 2-3                                       | 24 (8.4)                                         | 25 (8.7)                                                  |                                      |
| <b>Median income</b>                      |                                                  |                                                           | 0.0073                               |
| ≥\$46,000                                 | 100 (34.8)                                       | 101 (35.2)                                                |                                      |
| <\$46,000                                 | 187 (65.2)                                       | 186 (64.8)                                                |                                      |
| <b>Distance to facility, mi.<br/>(SD)</b> | 16.8 (162.9)                                     | 19.8 (38.5)                                               | 0.0629                               |
| <b>Facility type</b>                      |                                                  |                                                           | 0.0229                               |
| Academic                                  | 84 (29.3)                                        | 87 (30.3)                                                 |                                      |
| Non-academic                              | 203 (70.7)                                       | 200 (69.7)                                                |                                      |
| <b>Tumor Size</b>                         |                                                  |                                                           | 0.0425                               |
| ≤1 cm                                     | 73 (25.4)                                        | 77 (26.8)                                                 |                                      |
| >1-2 cm                                   | 127 (44.3)                                       | 128 (44.6)                                                |                                      |
| Unknown Size                              | 87 (30.3)                                        | 82 (28.6)                                                 |                                      |

mi.: miles. SD: standard deviation.

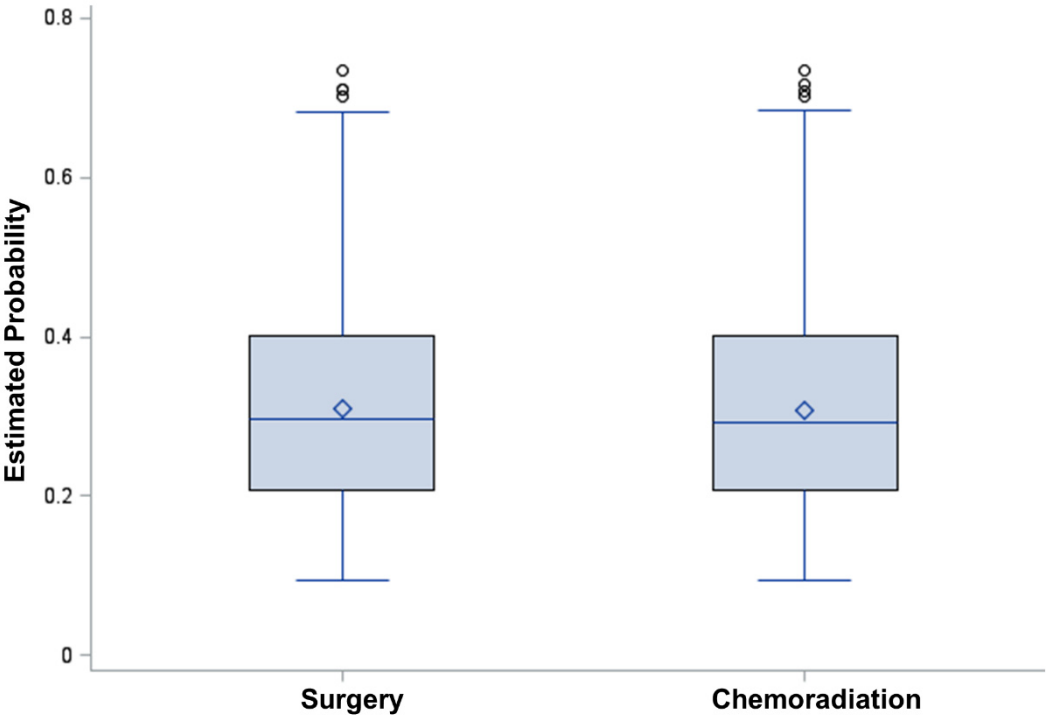

**Figure 2.** Distribution of propensity scores in the chemoradiation and the wide local excision (surgery) alone cohorts.

**Table 2.** Patient characteristics and standardized-differences in the propensity-matched cohort of chemoradiation and wide local excision.

| <b>Characteristic</b>                     | <b>Chemoradiation<br/>(N=1192)<br/>Number (%)</b> | <b>Surgery alone<br/>(N=1192)<br/>Number (%)</b> | <b>Standardized-<br/>differences</b> |
|-------------------------------------------|---------------------------------------------------|--------------------------------------------------|--------------------------------------|
| <b>Age (years)</b>                        |                                                   |                                                  |                                      |
| <50                                       | 318 (26.7)                                        | 304 (25.5)                                       | 0.0413                               |
| 50-59                                     | 343 (28.8)                                        | 349 (29.3)                                       |                                      |
| 60-69                                     | 232 (19.5)                                        | 223 (18.7)                                       |                                      |
| ≥70                                       | 299 (25.0)                                        | 316 (26.5)                                       |                                      |
| <b>Gender</b>                             |                                                   |                                                  | 0.0254                               |
| Female                                    | 672 (56.4)                                        | 687 (57.6)                                       |                                      |
| Male                                      | 457 (43.6)                                        | 505 (42.4)                                       |                                      |
| <b>Race</b>                               |                                                   |                                                  | 0.0119                               |
| White                                     | 1022 (85.7)                                       | 1017 (85.3)                                      |                                      |
| Non-white                                 | 107 (14.3)                                        | 175 (14.7)                                       |                                      |
| <b>Charlson-Deyo score</b>                |                                                   |                                                  | 0.0390                               |
| 0                                         | 943 (79.1)                                        | 938 (78.7)                                       |                                      |
| 1                                         | 132 (11.1)                                        | 145 (12.2)                                       |                                      |
| 2-3                                       | 117 (9.8)                                         | 109 (9.1)                                        |                                      |
| <b>Median income</b>                      |                                                   |                                                  | 0.0102                               |
| ≥\$46,000                                 | 492 (41.3)                                        | 498 (41.8)                                       |                                      |
| <\$46,000                                 | 700 (58.7)                                        | 694 (58.2)                                       |                                      |
| <b>Distance to facility, mi.<br/>(SD)</b> | 23.3 (106.3)                                      | 22.0 (79.4)                                      | 0.0046                               |
| <b>Facility type</b>                      |                                                   |                                                  | 0.0265                               |
| Academic                                  | 401 (33.6)                                        | 416 (34.9)                                       |                                      |
| Non-academic                              | 791 (66.4)                                        | 776 (65.1)                                       |                                      |

mi.: miles. SD: standard deviation.

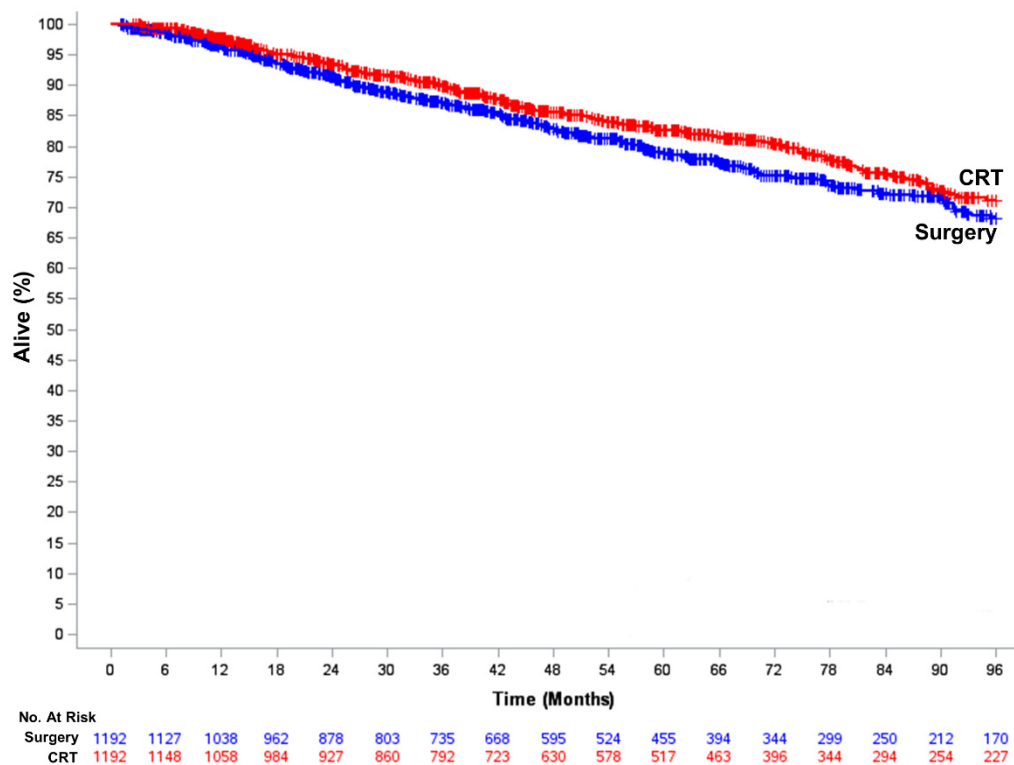

**Figure 3.** Overall survival of propensity score-matched patients treated with definitive chemoradiation compared to those receiving wide local excision (surgery) alone. Curves represent actual survival as estimated by the Kaplan-Meier method.
